# Supplementary material
Source: Research Square preprint supplement (doi:10.21203/rs.3.rs-8815659/v1)
Supplement: Supplementary file 1 [file a6c9291f06add96b7d1bcf20.docx]

**Tables**

Table 1- Demographic profile of the respondents (n=384) (Dhaka, Bangladesh, 2024-2025)

| Respondents' Profile | | Frequency | Percent | Mean | Std. Deviation | Skewness |
| --- | --- | --- | --- | --- | --- | --- |
| Age | Below 35 | 186 | 48.4 | 1.52 | 0.500 | -0.063 |
| Above 35 | 198 | 51.6 |
| Total | 384 | 100.0 |
| Education | Primary or below | 112 | 29.2 | 2.46 | 1.162 | 0.036 |
| Secondary or below | 83 | 21.6 |
| Higher Secondary or below | 90 | 23.4 |
| Above Higher Secondary | 99 | 25.8 |
| Total | 384 | 100.0 |
| Income | 10,000 - 20,000 BDT | 120 | 31.3 | 2.01 | 0.798 | -0.019 |
| 20,000 - 30,000 BDT | 140 | 36.5 |
| More than 30,000 BDT | 124 | 32.3 |
| Total | 384 | 100.0 |
| Residence | Slum | 186 | 48.4 | 1.52 | 0.500 | -0.063 |
| Building or apartment | 198 | 51.6 |
| Total | 384 | 100.0 |
| Dengue Infection history | Yes | 189 | 49.2 | 1.51 | 0.501 | -0.031 |
| No | 195 | 50.8 |
| Total | 384 | 100.0 |

Table 2- Knowledge of respondents regarding dengue prevention (N=384) (Dhaka, Bangladesh, 2024-2025)

Score 8 and above is classified as good knowledge out of a scale of 11. Good knowledge = 50.8 (195), poor = 49.2% (189).

| Statements | Yes  N (%) | No  N (%) | Not Sure  N (%) |
| --- | --- | --- | --- |
| Female Aedes mosquito is a vector mosquito for dengue transmission | 195 (50.8%) | 103 (26.8%) | 86 (22.4%) |
| Dengue is a flu or influenza type of disease | 190 (49.5%) | 106 (27.6%) | 88 (22.9%) |
| Dengue epidemic starts in the rainy season | 199 (51.8%) | 85 (22.1%) | 100 (26.0%) |
| High fever, chills and headache are common Symptoms of dengue | 208 (54.2%) | 92 (24.0%) | 84 (21.9%) |
| Both early morning and evening is the most active time for Aedes | 188 (49.0%) | 111 (28.9%) | 85 (22.1%) |
| Aedes can breed in dirty water | 201 (52.3%) | 89 (23.2%) | 94 (24.5%) |
| Transmission cycle of Aedes mosquito is man-mosquito-man | 192 (50.0%) | 94 (24.5%) | 98 (25.5%) |
| Tightly covering water containers can reduce the breeding place for the Aedes | 178 (46.4%) | 107 (27.9%) | 99 (25.8%) |
| Paracetamol is used in dengue infection to relieve pain and lower temperature | 192 (50.0%) | 93 (24.2%) | 99 (25.8%) |
| Stagnant water around the house in discarded tires, broken pots, coconut shell are breeding places of Aedes | 175 (45.6%) | 114 (29.7%) | 95 (24.7%) |
| Liquid foods are beneficial for dengue treatment | 195 (50.8%) | 90 (23.4%) | 99 (25.8%) |

Table 3- Attitude of respondents regarding dengue prevention (N=384) (Dhaka, Bangladesh, 2024-2025)

| Statements | Strongly Disagree  N (%) | Disagree  N (%) | Neutral  N (%) | Agree  N (%) | Strongly Agree  N (%) |
| --- | --- | --- | --- | --- | --- |
| I am in fear of dengue transmission | 93 (24.2%) | 120 (31.2%) | 84 (21.9%) | 41 (10.7%) | 46 (12.0%) |
| I am at risk of contracting dengue infection | 104 (27.1%) | 87 (22.7%) | 85 (22.1%) | 51 (13.3%) | 57 (14.8%) |
| Dengue is a serious illness | 100 (26.0%) | 91 (23.7%) | 94 (24.5%) | 53 (13.8%) | 46 (12.0%) |
| It is necessary to consult with doctor after finding dengue symptoms | 102 (26.6%) | 108 (28.1%) | 84 (21.9%) | 38 (9.9%) | 52 (13.5%) |
| Public has a crucial role in dengue prevention | 77 (20.1%) | 89 (23.2%) | 106 (27.6%) | 56 (14.6%) | 56 (14.6%) |
| It is not only governments responsibility to prevent dengue | 94 (24.5%) | 107 (27.9%) | 101 (26.3%) | 39 (10.2%) | 43 (11.2%) |
| Dengue can be prevented by vector control strategies | 86 (22.4%) | 107 (27.9%) | 96 (25.0%) | 44 (11.5%) | 51 (13.3%) |
| Controlling breeding places of Aedes mosquito can prevent dengue | 86 (22.4%) | 107 (27.9%) | 96 (25.0%) | 44 (11.5%) | 51 (13.3%) |

A score 75% and above is classified as good. Good = 29.9% (115), Poor = 70.1% (269).

Table 4- Practice of respondents regarding dengue prevention (N=384) (Dhaka, Bangladesh, 2024-2025)

| Statements | Never  N (%) | Rarely  N (%) | Sometimes  N (%) | Often  N (%) | Always  N (%) |
| --- | --- | --- | --- | --- | --- |
| Do you use a mosquito bed net? | 70 (18.2%) | 117 (30.5%) | 105 (27.3%) | 54 (14.1%) | 38 (9.9%) |
| Do you have screen windows? | 96 (25.0%) | 116 (30.2%) | 79 (20.6%) | 47 (12.2%) | 46 (12.0%) |
| Do you use mosquito repellent coil? | 82 (21.4%) | 108 (28.1%) | 92 (24.0%) | 51 (13.3%) | 51 (13.3%) |
| Do you use mosquito repellent spray? | 108 (28.1%) | 107 (27.9%) | 76 (19.8%) | 52 (13.5%) | 41 (10.7%) |
| Do you use mosquito repellent cream or oil? | 109 (28.4%) | 99 (25.8%) | 80 (20.8%) | 42 (10.9%) | 54 (14.1%) |
| Do you practice covering water containers at home? | 92 (24.0%) | 107 (27.9%) | 85 (22.1%) | 46 (12.0%) | 54 (14.1%) |
| Do you maintain the proper disposal of garbage? | 104 (27.1%) | 97 (25.3%) | 93 (24.2%) | 43 (11.2%) | 47 (12.2%) |
| Do you examine the mosquito breeding containers in the toilet? | 97 (25.3%) | 107 (27.9%) | 87 (22.7%) | 46 (12.0%) | 47 (12.2%) |
| Do you examine any discarded thing that can hold water around your house? | 91 (23.7%) | 109 (28.4%) | 98 (25.5%) | 40 (10.4%) | 46 (12.0%) |
| Do you examine any discarded thing that can hold water around your house? | 97 (25.3%) | 102 (26.6%) | 95 (24.7%) | 52 (13.5%) | 38 (9.9%) |

A score 75% and above is classified as good. Good = 17.4% (67), Poor = 82.6% (317).

Table 5- Correlational analysis among knowledge, attitude and practice scores. (Dhaka, Bangladesh, 2024-2025)

|  | | Knowledge Total Score | Attitude Total score | Practice Total Score |
| --- | --- | --- | --- | --- |
| Knowledge Total Score | Pearson Correlation | 1 | .448** | .356** |
| Sig. (2-tailed) |  | .000 | .000 |
| N | 384 | 384 | 384 |
| Attitude Total score | Pearson Correlation | .448** | 1 | .209** |
| Sig. (2-tailed) | .000 |  | .000 |
| N | 384 | 384 | 384 |
| Practice Total Score | Pearson Correlation | .356** | .209** | 1 |
| Sig. (2-tailed) | .000 | .000 |  |
| N | 384 | 384 | 384 |

**. Correlation is significant at the 0.01 level (2-tailed).

Table 6- Key predictors of knowledge, attitude and practice (Dhaka, Bangladesh, 2024-2025)

| Characteristics | Model I knowledge | | Model II attitude | | Model III practice | |
| --- | --- | --- | --- | --- | --- | --- |
|  | Ba (95% Clb) | *p-value* | Ba (95% Clb) | *p-value* | Ba (95% Clb) | *p-value* |
| Age | 4.225 (-0.017;0.464) | 0.069 | -0.752 (-0.1.900;0.397) | 0.199 | -0.933 (-2.717;0.851) | 0.305 |
| Education | 1.329 (-0.017;0.464) | 0.00 | 2.727 (2.234;3.219) | 0.00 | 3.409 (2.643;4.174) | 0.00 |
| Income | -0.122 (-0.27;0.031) | 0.117 | 2.728 (2.002;3.454) | 0.00 | -0.500 (-1.628;0.628) | 0.384 |
| Residence | -0.121(-0.361;0.119) | 0.322 | .059 (-1.085;1.203) | 0.919 | 8.318 (6.541;10.095) | 0.00 |
| Dengue Infection History | 0.185(-0.057;0.427) | 0.134 | -0.092 (-1.246;1.062) | 0.875 | -0.111 (-1.904;1.682) | 0.903 |
| Coefficient of Determination | R2= 0.630 |  | R2= 0.320 |  | R2= 0.319 |  |

*p< 0.05; ***p<0.01; ***p,0.001

aB, beta coefficient.

bCI, confidence interval.

cR2, the coefficient of determination.
